# Supplementary material for: Review of Canine Lymphoma Treated with Chemotherapy—Outcomes and Prognostic Factors
Source: MDPI journal article supplement (doi:10.3390/vetsci10050342), 2023-05-11
Supplement: s1 [file s1]

**Supplemental Materials:****Table S1:** Prognostic variables that were reported in less than 10 papers.

NA – not applicable as not included in relevant paper.

|                                  |                  | Papers included             |                |               | % Of papers where prognostic for: |          |
|----------------------------------|------------------|-----------------------------|----------------|---------------|-----------------------------------|----------|
| Variable included in analysis    | Number of papers | Both remission and survival | Remission only | Survival only | Remission                         | Survival |
| <i>Patient Characteristics:</i>  |                  |                             |                |               |                                   |          |
| Anorexia                         | 2                | 2                           | 0              | 0             | 0.0                               | 50.0     |
| Fever                            | 1                | 1                           | 0              | 0             | 0.0                               | 0.0      |
| Cachexia                         | 1                | 1                           | 0              | 0             | 0.0                               | 0.0      |
| Glasgow performance score        | 1                | 1                           | 0              | 0             | 0.0                               | 100.0    |
| Geographic locality              | 1                | 0                           | 1              | 0             | 100.0                             | NA       |
| <i>Lymphoma Characteristics:</i> |                  |                             |                |               |                                   |          |
| Cell size                        | 3                | 2                           | 0              | 1             | 50.0                              | 100.0    |
| Grade                            | 6                | 4                           | 1              | 1             | 0.0                               | 20.0     |
| Histology                        | 8                | 4                           | 1              | 3             | 20.0                              | 42.9     |
| Mitotic count                    | 1                | 0                           | 0              | 1             | NA                                | 100.0    |
| <i>Laboratory findings:</i>      |                  |                             |                |               |                                   |          |
| Albumin                          | 3                | 3                           | 0              | 0             | 66.7                              | 66.7     |
| LDH                              | 4                | 3                           | 0              | 1             | 33.3                              | 0.0      |

|                                      |   |   |   |   |       |       |
|--------------------------------------|---|---|---|---|-------|-------|
| Neutrophils<br>(Number or ratio)     | 7 | 7 | 0 | 0 | 28.6  | 28.6  |
| Monocytes<br>(Number of ratio)       | 6 | 6 | 0 | 0 | 33.3  | 16.7  |
| ALP                                  | 3 | 0 | 3 | 0 | 0.0   | NA    |
| T-reg                                | 1 | 1 | 0 | 0 | 100.0 | 100.0 |
| Bilirubin                            | 1 | 0 | 1 | 0 | 0.0   | NA    |
| Urea                                 | 1 | 1 | 0 | 0 | 0.0   | 0.0   |
| Coagulation                          | 1 | 1 | 0 | 0 | 100.0 | 100.0 |
| Ferritin                             | 1 | 0 | 0 | 1 | NA    | 100.0 |
| <i>Treatment parameters:</i>         |   |   |   |   |       |       |
| Toxicity                             | 5 | 4 | 1 | 0 | 20.0  | 25.0  |
| Dose<br>Modification                 | 6 | 5 | 1 | 0 | 16.7  | 40.0  |
| Weight<br>change during<br>treatment | 2 | 2 | 0 | 0 | 50.0  | 50.0  |

**Table S2:** Papers that included a molecular, genetic, immunohistochemical or other biomarker as a prognostic factor analysed by multivariate analysis.

| Paper                   | Factors included        | Prognostic for remission | Prognostic for survival |
|-------------------------|-------------------------|--------------------------|-------------------------|
| Aresu et al 2021 [72]   | PD-L1, PD1, CD8A, Ki67  | PD-L1, PD-1              | PD-L1                   |
| Bergman et al 1996 [77] | P-glycoprotein          | P-glycoprotein           | P-glycoprotein          |
| Deravi et al [91]       | T-cell immunophenotypes | CD4, CD8, MHCII          | CD4, CD8, MHCII         |

|                                   |                                                   |                                |                             |
|-----------------------------------|---------------------------------------------------|--------------------------------|-----------------------------|
| Fujiwara-Igarashi et al 2014 [97] | p14, p15, p16                                     | NA                             | p16                         |
| Garnica et al 2020 [98]           | microRNA from small extravesicular vesicles (SEV) | NA                             | SEV concentration, microRNA |
| Hahn et al 1994 [195]             | Karyotype                                         | Trisomy chromosome 13          | Trisomy chromosome 13       |
| Kiupel et al 1999 [190]           | AgNOR                                             | AgNOR                          | AgNOR                       |
| Lee et al 1996 [191]              | P-glycoprotein                                    |                                | P-glycoprotein              |
| Pinheiro et al 2014 [192]         | T <sub>reg</sub> , MHCII                          | T <sub>reg</sub> , MHCII       | T <sub>reg</sub>            |
| Poggi et al 2017 [124]            | K-67                                              |                                | Ki-67                       |
| Rao et al 2011 [193]              | MHCII, CD34, CD21, CD5                            | MHCII                          | MHCII                       |
| Vail et al 1996 [194]             | Potential doubling time, AgNOR, PCNA, DNA ploidy  | Potential doubling time, AgNOR | AgNOR                       |
| Von Euler et al 2004 [195]        | Serum thymidine kinase                            |                                | Serum thymidine kinase      |
| Williams et al 2008 [196]         | CD3, CD4, CD5, CD8, CD18, CD21, CD34, CD34, MCHII | NA                             | CD34                        |

NA – remission or survival not analysed.

**Table S3:** Papers evaluating treatment protocol variations.

| Paper                      | Treatment parameter analysed                                 | Prognostic? |
|----------------------------|--------------------------------------------------------------|-------------|
| Aresu et al 2021 [72]      | Addition of a vaccine to CHOP protocol                       | Yes         |
| Boye et al 2021 [196]      | Experimental drug (F14512) or etoposide                      | No          |
| Deravi et al 2017 [91]     | Combination versus single agent in T-cell                    | No          |
| Goodman et al 2016 [100]   | Substitution of mitoxantrone in VELCAP-TSC                   | No          |
| Hahn et al 1994 [195]      | Doxorubicin versus epirubicin                                | No          |
| Hosoya et al 2007 [5]      | COAP versus UWM-19                                           | Yes         |
| Lautscham et al 2017 [166] | Maintenance versus no maintenance                            | No          |
| Lee et al 1996 [191]       | CHOP-like combination versus doxo or doxo/vinc               | No          |
| Miller et al 2009 [197]    | CHOP versus doxorubicin                                      | Yes         |
| Mutsaers et al 2002        | Doxo versus doxo/piroxicam                                   | No          |
| Pinheiro et al 2014 [192]  | CHOP versus other protocols that did not include doxorubicin | Yes         |
| Rao et al 2011 [193]       | CHOP versus single agent versus pred                         | Yes         |
| Rassnick et al 2010 [64]   | CHOP versus CHOP/CCNU/MOPP                                   | Yes         |
| Romano et al 2016 [169]    | CHOP versus others                                           | No          |

|                            |                                          |    |
|----------------------------|------------------------------------------|----|
| Siedlecki et al 2006 [128] | Drug substitutions in CHOP-like protocol | No |
| Simon et al 2008 [35]      | CHOP versus doxo                         | No |
| Zandvliet et al 2013 [135] | CHOP with versus without prednisolone    | No |

**Table S4:** Summary findings from the papers that only included univariate analysis. Px = prognosis.

| Factor                                                                                | Px – Remission | Px – Survival | Px – Both | Not Px – Remission | Not Px – survival | Not Px – both | Not included |
|---------------------------------------------------------------------------------------|----------------|---------------|-----------|--------------------|-------------------|---------------|--------------|
| <b>Studies with Univariate analysis (n=52) – studies (cases) (total cases = 2958)</b> |                |               |           |                    |                   |               |              |
| Age                                                                                   | 0              | 1(73)         | 1 (31)    | 2 (82)             | 5(258)            | 5(442)        | 38(2072)     |
| Weight                                                                                | 0              | 0             | 0         | 2 (82)             | 2(78)             | 7(513)        | 41(2285)     |
| Breed                                                                                 | 0              | 2(194)        | 0         | 0                  | 0                 | 0             | 50(2764)     |
| Sex                                                                                   | 1 (88)         | 0             | 2 (245)   | 2 (82)             | 5(258)            | 8(479)        | 34(1806)     |
| Neuter                                                                                | 0              | 0             | 0         | 0                  | 0                 | 0             | 52 (2958)    |
| Anatomic location <sup>a</sup>                                                        | 0              | 1 (26)        | 0         | 1 (46)             | 0                 | 1 (24)        | 48(2851)     |
| Stage                                                                                 | 3 (123)        | 3 (246)       | 1 (43)    | 3(153)             | 2 (96)            | 12 (997)      | 28(1300)     |
| Substage                                                                              | 4 (141)        | 4(373)        | 5 (470)   | 2(130)             | 2(78)             | 5(470)        | 31(1629)     |
| Immunophenotype                                                                       | 3(145)         | 1 (112)       | 2 (201)   | 0                  | 3(95)             | 2 (161)       | 41(2244)     |
| Prior prednisolone                                                                    | 1 (28)         | 0             | 0         | 0                  | 1 (62)            | 0             | 50(2868)     |
| Anaemia                                                                               | 0              | 0             | 0         | 0                  | 1(121)            | 4(130)        | 47(2707)     |
| Thrombocytopenia <sup>b</sup>                                                         | 0              | 1(24)         | 0         | 0                  | 1(121)            | 1(31)         | 49(2782)     |
| Neutrophils <sup>c</sup>                                                              | 2(115)         | 0             | 0         | 0                  | 0                 | 1 (24)        | 49(2819)     |
| Monocytes <sup>c</sup>                                                                | 0              | 0             | 0         | 0                  | 0                 | 0             | 52 (2958)    |
| Hypercalcaemia                                                                        | 0              | 0             | 1 (97)    | 2 (105)            | 0                 | 5(337)        | 44(2419)     |
| Hypoalbuminaemia                                                                      | 1 (28)         | 0             | 0         | 0                  | 0                 | 1(18)         | 50(2912)     |

|                   |        |         |            |        |   |            |          |
|-------------------|--------|---------|------------|--------|---|------------|----------|
| Response          | 0      | 3 (302) | 3<br>(165) | 1 (46) | 0 | 1 (37)     | 44(2408) |
| Toxicity          | 0      | 0       | 1<br>(50)  | 0      | 0 | 2<br>(142) | 49(2766) |
| Dose modification | 1 (62) | 0       | 1<br>(130) | 0      | 0 | 1<br>(104) | 49(2662) |
| Anorexia          | 0      | 0       | 0          | 0      | 0 | 0          | 52(2958) |
| Histology         | 0      | 0       | 2<br>(77)  | 0      | 0 | 2(60)      | 48(2821) |
| Grade             | 0      | 0       | 0          | 0      | 0 | 2<br>(153) | 50(2805) |
| Coagulation       | 0      | 1 (27)  | 0          | 0      | 0 | 0          | 51(2931) |

<sup>a</sup> – 1 study (11 cases) only included rectal lymphoma and compared to literature

<sup>b</sup> – 1 study (24 cases) of T-cell lymphoma showed thrombocytopenia to be a positive prognostic factor for survival

<sup>c</sup> - neutrophils and monocytes include both absolute numbers and ratios
